# Supplementary material for: Fabrication and performance evaluation of a novel membrane electrode assembly for DMFCs
Source: Royal Society of Chemistry journal article supplement (doi:10.1039/c5ra21389d), 2015-12-17
Supplement: c5ra21389d1.pdf [file c5ra21389d1.pdf]

## Fabrication and performance evaluation of a novel membrane electrode assembly for DMFC

Received 00th January 20xx,  
Accepted 00th January 20xx

Meissam Noroozifar, Zahra Yavari, Mozghan Khorasani-Motlagh, Tahere Ghasemi, Seyed-Hamzeh Rohani-Yazdi, Majid Mohammadi

DOI: 10.1039/x0xx00000x

www.rsc.org/

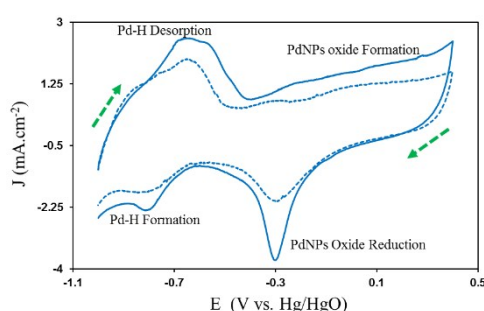

**Figure S1.** The cyclic voltammogram of GC/PdNPs-LaNi<sub>0.5</sub>Fe<sub>0.5</sub>O<sub>3</sub>NPs-CH electrode after 1 (solid line) and 100 (dash line) cycles sweep with the palladium loading of 0.31 mg.cm<sup>-2</sup> in 1 M KOH aqueous solution at 50 mV.s<sup>-1</sup>.

### Mechanism of methanol oxidation on PdNPs-LaNi<sub>0.5</sub>Fe<sub>0.5</sub>O<sub>3</sub>NPs-CH nanocomposite

Similar to the mechanism of methanol oxidation on noble metal surface, the following reaction pathway can be proposed:

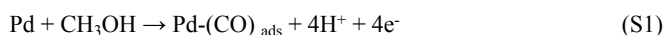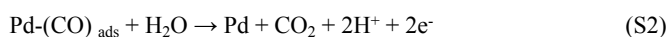

It seems that the possible reaction pathway of methanol oxidation on the perovskite LaNi<sub>0.5</sub>Fe<sub>0.5</sub>O<sub>3</sub> surface in the presence of an alkaline electrolyte be as follows (M<sup>n+</sup>: La<sup>3+</sup>, Ni<sup>2+</sup> and Fe<sup>3+</sup>):

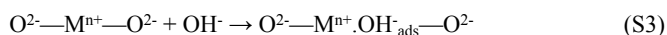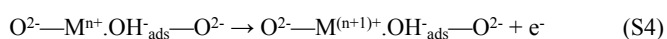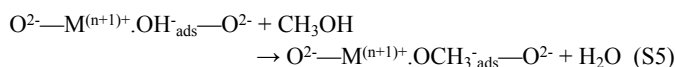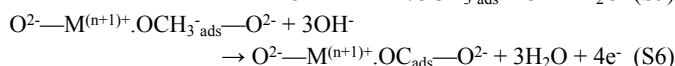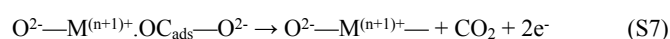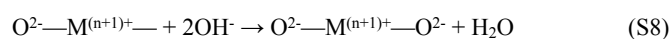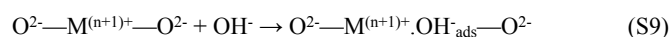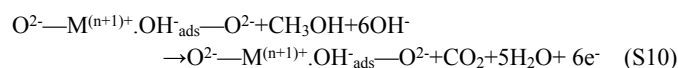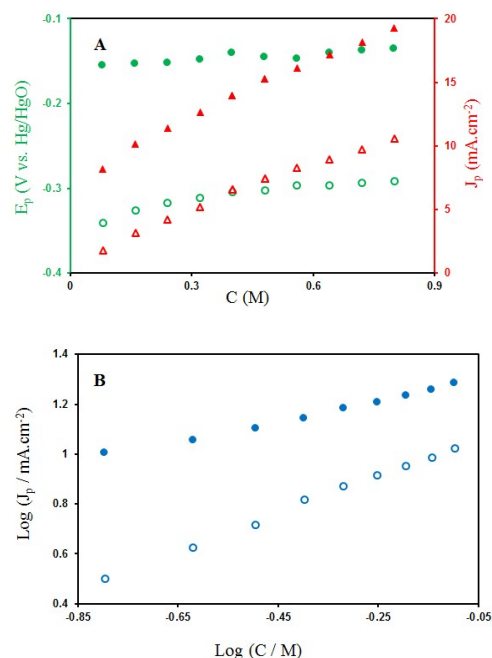

**Figure S2.** Plot of the (A) effect of methanol concentration on peak potential (○) and current density (Δ) of methanol oxidation and (B) peak current dependence vs. the logarithm of methanol concentration at forward (solid) and backward (hollow) sweep on the GC/PdNPs-LaNi<sub>0.5</sub>Fe<sub>0.5</sub>O<sub>3</sub>NPs-CH electrode in 1 M KOH aqueous solution and 50 mV.s<sup>-1</sup> scan rate.

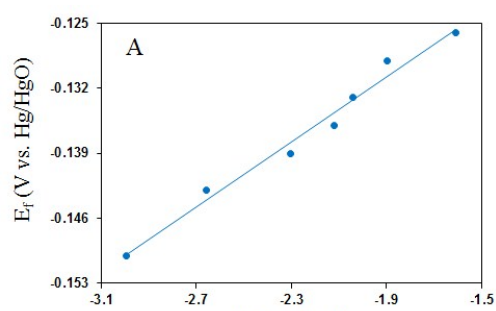

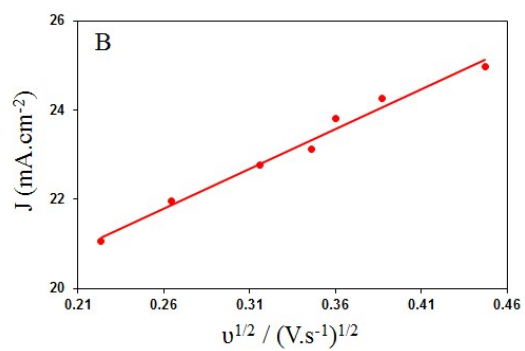

**Figure S3.** The plot of (A) the anodic peak potential vs.  $\ln v$  and (B) the anodic peak current density of methanol oxidation vs.  $v^{1/2}$  on the GC/PdNPs-LaNi<sub>0.5</sub>Fe<sub>0.5</sub>O<sub>3</sub>NPs-CH electrode in 0.8 M methanol and 1 M KOH aqueous solution at different scan rates: 50 - 200 mV.s<sup>-1</sup>.
